# Supplementary material for: Identifying Critical Thresholds in the Impacts of Invasive Alien Plants and Dune Paths on Native Coastal Dune Vegetation
Source: MDPI journal article supplement (doi:10.3390/land12010135), 2022-12-31
Supplement: s1 [file s1]

## Supplementary Materials

Table S1. Complete list of plant taxa matched to the respective ecological guild and mean cover (%) for the shifting dunes under control (total IAP cover < 15%) and invaded conditions (total IAP cover  $\geq$  15%).

| Guild                             | Taxon                                                | Control      | Invaded      |
|-----------------------------------|------------------------------------------------------|--------------|--------------|
| Diagnostic                        | <i>Ammophila arenaria</i> subsp. <i>australis</i>    | 3.27         | 2.78         |
|                                   | <i>Calystegia soldanella</i>                         | 2.19         | 1.04         |
|                                   | <i>Cyperus capitatus</i>                             | 5.56         | 1.73         |
|                                   | <i>Echinophora spinosa</i>                           | 1.73         | 0.92         |
|                                   | <i>Elymus farctus</i>                                | 13.04        | 8.22         |
|                                   | <i>Eryngium maritimum</i>                            | 1.16         | 0.32         |
|                                   | <i>Euphorbia paralias</i>                            | 0.12         | 0.03         |
|                                   | <i>Lotus cytisoides</i>                              | 14.81        | 5.97         |
|                                   | <i>Medicago marina</i>                               | 9.35         | 1.60         |
|                                   | <i>Polygonum maritimum</i>                           | 0.12         | < 0.01       |
|                                   | <i>Silene conica</i>                                 | 4.50         | 1.52         |
|                                   | <i>Sporobolus virginicus</i>                         | 2.44         | 1.33         |
|                                   | <b>Sum</b>                                           | <b>58.27</b> | <b>25.45</b> |
| Species of other coastal habitats | <i>Atriplex prostrata</i>                            | 0.02         | < 0.01       |
|                                   | <i>Bartsia trixago</i>                               | < 0.01       | 0.20         |
|                                   | <i>Blackstonia perfoliata</i>                        | 0.02         | < 0.01       |
|                                   | <i>Cakile maritima</i> subsp. <i>maritima</i>        | 0.58         | 0.20         |
|                                   | <i>Cerastium semidecandrum</i>                       | 0.02         | 0.12         |
|                                   | <i>Crepis vesicaria</i> subsp. <i>taraxacifolia</i>  | < 0.01       | 0.03         |
|                                   | <i>Elymus caninus</i>                                | 0.12         | < 0.01       |
|                                   | <i>Erodium laciniatum</i>                            | 0.38         | 0.32         |
|                                   | <i>Euphorbia terracina</i>                           | 1.63         | 1.20         |
|                                   | <i>Festuca fasciculata</i>                           | 6.15         | 1.75         |
|                                   | <i>Hypochaeris achyrophorus</i>                      | 0.23         | 0.10         |
|                                   | <i>Lagurus ovatus</i>                                | 0.12         | < 0.01       |
|                                   | <i>Limbarda crithmoides</i> subsp. <i>longifolia</i> | 1.56         | 0.22         |
|                                   | <i>Medicago littoralis</i>                           | 0.23         | 0.22         |
|                                   | <i>Medicago lupulina</i>                             | < 0.01       | 0.10         |
|                                   | <i>Ononis variegata</i>                              | 1.27         | 1.75         |
|                                   | <i>Parapholis incurva</i>                            | 0.58         | 1.25         |
|                                   | <i>Phleum arenarium</i> subsp. <i>caesium</i>        | 3.50         | 3.72         |
|                                   | <i>Pinus halepensis</i>                              | 0.23         | 0.50         |
|                                   | <i>Rostraria litorea</i>                             | 2.94         | 1.05         |
|                                   | <i>Salsola kali</i>                                  | < 0.01       | 0.13         |
|                                   | <i>Salsola soda</i>                                  | < 0.01       | 1.25         |
|                                   | <i>Scirpoides holoschoenus</i>                       | 2.31         | 2.25         |
|                                   | <i>Silene colorata</i>                               | < 0.01       | 0.05         |
|                                   | <i>Sixalix atropurpurea</i>                          | 0.12         | 0.13         |
|                                   | <i>Verbascum niveum</i> subsp. <i>garganicum</i>     | 0.35         | 0.20         |
|                                   | <b>Sum</b>                                           | <b>22.36</b> | <b>16.74</b> |

|            |                                 |             |              |
|------------|---------------------------------|-------------|--------------|
| Generalist | <i>Aetheorhiza bulbosa</i>      | 1.85        | 0.73         |
|            | <i>Anisantha madritensis</i>    | 0.62        | 0.13         |
|            | <i>Artemisia campestris</i>     | 0.60        | 0.10         |
|            | <i>Avena barbata</i>            | 0.12        | < 0.01       |
|            | <i>Briza media</i>              | 0.58        | < 0.01       |
|            | <i>Cutandia maritima</i>        | 0.12        | 0.10         |
|            | <i>Cynodon dactylon</i>         | 1.02        | 0.83         |
|            | <i>Equisetum telmateia</i>      | < 0.01      | 0.02         |
|            | <i>Glycyrrhiza glabra</i>       | < 0.01      | 0.50         |
|            | <i>Hedypnois rhagadioloides</i> | 0.13        | 0.12         |
|            | <i>Polycarpon tetraphyllum</i>  | < 0.01      | < 0.01       |
|            | <i>Reichardia picroides</i>     | 0.02        | 0.03         |
|            | <b>Sum</b>                      | <b>5.04</b> | <b>2.57</b>  |
| Alien      | <i>Ambrosia psilostachya</i>    | 0.13        | 0.52         |
|            | <i>Carpobrotus edulis</i>       | 0.12        | < 0.01       |
|            | <i>Cenchrus longispinus</i>     | 0.12        | 0.27         |
|            | <i>Erigeron canadensis</i>      | 0.25        | 0.25         |
|            | <i>Oenothera stueckii</i>       | < 0.01      | 20.42        |
|            | <i>Xanthium orientale</i>       | 0.38        | 1.10         |
|            | <b>Sum</b>                      | <b>1.00</b> | <b>22.55</b> |

Table S2. Complete list of plant taxa matched to the respective ecological guild and mean cover (%) for the transition dunes under control (total IAP cover < 15%) and invaded conditions (total IAP cover  $\geq$  15%).

| Guild                             | Taxon                                                  | Control      | Invaded      |
|-----------------------------------|--------------------------------------------------------|--------------|--------------|
| Diagnostic                        | <i>Corynephorus articulatus</i>                        | 0.12         | 0.08         |
|                                   | <i>Erodium laciniatum</i>                              | < 0.01       | 0.10         |
|                                   | <i>Euphorbia terracina</i>                             | 1.68         | 1.50         |
|                                   | <i>Festuca fasciculata</i>                             | 2.64         | 4.66         |
|                                   | <i>Fumana procumbens</i>                               | 4.95         | 0.46         |
|                                   | <i>Helianthemum nummularium</i> subsp. <i>obscurum</i> | 0.12         | < 0.01       |
|                                   | <i>Hypochaeris achyrophorus</i>                        | 0.30         | 0.15         |
|                                   | <i>Lagurus ovatus</i>                                  | 0.30         | 0.10         |
|                                   | <i>Lomelosia argentea</i>                              | 0.02         | < 0.01       |
|                                   | <i>Medicago littoralis</i>                             | 4.13         | 1.31         |
|                                   | <i>Ononis variegata</i>                                | 4.03         | 1.44         |
|                                   | <i>Petrorhagia saxifraga</i> subsp. <i>saxifraga</i>   | 0.02         | < 0.01       |
|                                   | <i>Phleum arenarium</i> subsp. <i>caesium</i>          | 7.55         | 6.11         |
|                                   | <i>Salsola kali</i>                                    | 1.92         | 1.65         |
|                                   | <i>Silene colorata</i>                                 | 2.78         | 2.46         |
|                                   | <i>Silene conica</i>                                   | < 0.01       | 0.04         |
|                                   | <i>Teucrium capitatum</i>                              | 0.20         | < 0.01       |
|                                   | <i>Thymus pulegioides</i>                              | 0.23         | < 0.01       |
|                                   | <i>Verbascum niveum</i> subsp. <i>garganicum</i>       | 1.10         | 1.65         |
|                                   | <b>Sum</b>                                             | <b>32.09</b> | <b>21.71</b> |
| Species of other coastal habitats | <i>Ammophila arenaria</i> subsp. <i>australis</i>      | < 0.01       | 0.95         |
|                                   | <i>Bartsia trixago</i>                                 | < 0.01       | 0.24         |
|                                   | <i>Blackstonia perfoliata</i>                          | < 0.01       | 0.01         |
|                                   | <i>Cakile maritima</i>                                 | < 0.01       | 0.01         |
|                                   | <i>Carex liparocarpos</i>                              | 0.20         | < 0.01       |
|                                   | <i>Catapodium rigidum</i>                              | 0.05         | 0.07         |
|                                   | <i>Centaureum pulchellum</i>                           | < 0.01       | 0.00         |
|                                   | <i>Cerastium semidecandrum</i>                         | 0.23         | 0.13         |
|                                   | <i>Crepis vesicaria</i> subsp. <i>taraxacifolia</i>    | 0.02         | 0.03         |
|                                   | <i>Cyperus capitatus</i>                               | 5.47         | 3.25         |
|                                   | <i>Draba obconica</i>                                  | 0.02         | < 0.01       |
|                                   | <i>Echinophora spinosa</i>                             | 0.32         | 0.45         |
|                                   | <i>Elymus farctus</i>                                  | 0.53         | 0.54         |
|                                   | <i>Euphorbia paralias</i>                              | 0.02         | < 0.01       |
|                                   | <i>Juncus acutus</i>                                   | < 0.01       | 0.08         |
|                                   | <i>Lotus cytisoides</i>                                | 4.10         | 5.78         |
|                                   | <i>Medicago marina</i>                                 | 0.80         | 1.59         |
|                                   | <i>Medicago minima</i>                                 | 0.10         | < 0.01       |
|                                   | <i>Pancratium maritimum</i>                            | 0.50         | < 0.01       |
|                                   | <i>Parapholis incurva</i>                              | 0.10         | < 0.01       |
|                                   | <i>Pilosella piloselloides</i>                         | < 0.01       | 0.01         |
|                                   | <i>Pinus pinea</i>                                     | 0.02         | < 0.01       |
|                                   | <i>Plantago arenaria</i>                               | < 0.01       | 0.01         |
|                                   | <i>Pulicaria sicula</i>                                | 0.65         | 0.26         |
|                                   | <i>Rostraria litorea</i>                               | < 0.01       | 0.08         |

|            |                               |              |              |
|------------|-------------------------------|--------------|--------------|
|            | <i>Sanguisorba minor</i>      | 0.62         | 0.28         |
|            | <i>Scabiosa triandra</i>      | 0.10         | 0.10         |
|            | <i>Silene vulgaris</i>        | 0.13         | 0.10         |
|            | <i>Sixalix atropurpurea</i>   | 0.72         | 0.38         |
|            | <i>Sporobolus virginicus</i>  | 0.10         | 0.15         |
|            | <b>Sum</b>                    | <b>14.79</b> | <b>14.47</b> |
| Generalist | <i>Aetheorhiza bulbosa</i>    | < 0.01       | < 0.01       |
|            | <i>Anisantha madritensis</i>  | 0.52         | 0.01         |
|            | <i>Arenaria leptoclados</i>   | < 0.01       | 0.03         |
|            | <i>Artemisia campestris</i>   | 2.62         | 0.38         |
|            | <i>Avellinia festucoides</i>  | 0.07         | 0.04         |
|            | <i>Avena barbata</i>          | 0.22         | 0.23         |
|            | <i>Calamagrostis epigejos</i> | < 0.01       | 0.03         |
|            | <i>Centaureum erythraea</i>   | < 0.01       | 0.15         |
|            | <i>Cutandia maritima</i>      | 3.05         | 0.46         |
|            | <i>Cynodon dactylon</i>       | 0.02         | 0.23         |
|            | <i>Dactylis glomerata</i>     | 0.10         | < 0.01       |
|            | <i>Dittrichia viscosa</i>     | < 0.01       | 0.08         |
|            | <i>Euphorbia peplis</i>       | < 0.01       | < 0.01       |
|            | <i>Hypochaeris radicata</i>   | < 0.01       | 0.01         |
|            | <i>Silene otites</i>          | 0.15         | 0.03         |
|            | <b>Sum</b>                    | <b>6.74</b>  | <b>1.66</b>  |
| Alien      | <i>Ambrosia psilostachya</i>  | 0.88         | 2.38         |
|            | <i>Amorpha fruticosa</i>      | < 0.01       | 0.38         |
|            | <i>Cenchrus longispinus</i>   | 0.22         | 1.21         |
|            | <i>Cuscuta campestris</i>     | < 0.01       | 0.01         |
|            | <i>Erigeron canadensis</i>    | 0.02         | 0.33         |
|            | <i>Erigeron sumatrensis</i>   | < 0.01       | 0.01         |
|            | <i>Oenothera stueckii</i>     | < 0.01       | 20.44        |
|            | <i>Senecio inaequidens</i>    | < 0.01       | 0.01         |
|            | <i>Sporobolus pumilus</i>     | 0.02         | 0.15         |
|            | <i>Xanthium orientale</i>     | 0.12         | 0.16         |
|            | <b>Sum</b>                    | <b>1.25</b>  | <b>25.08</b> |

Table S3. SIMPER analysis

| Habitats         | Taxon                                         | Guild                             | Av. Dissim | Contribution (%) | Cumulative (%) | Mean Control (%) | Mean Invaded (%) |
|------------------|-----------------------------------------------|-----------------------------------|------------|------------------|----------------|------------------|------------------|
| Shifting dunes   | <i>Oenothera stucchii</i>                     | Alien                             | 13.6       | 16.6             | 16.6           | 0.0              | 20.4             |
|                  | <i>Lotus cytisoides</i>                       | Diagnostic                        | 9.6        | 11.8             | 28.4           | 14.8             | 6.0              |
|                  | <i>Elymus farctus</i>                         | Diagnostic                        | 7.5        | 9.1              | 37.5           | 13.0             | 8.2              |
|                  | <i>Medicago marina</i>                        | Diagnostic                        | 6.0        | 7.4              | 44.9           | 9.4              | 1.6              |
|                  | <i>Cyperus capitatus</i>                      | Diagnostic                        | 4.2        | 5.1              | 50.1           | 5.6              | 1.7              |
| Transition dunes | <i>Oenothera stucchii</i>                     | Alien                             | 18.6       | 20.7             | 20.7           | 0.0              | 20.4             |
|                  | <i>Phleum arenarium</i> subsp. <i>caesium</i> | Diagnostic                        | 8.1        | 9.0              | 29.6           | 7.6              | 6.1              |
|                  | <i>Cyperus capitatus</i>                      | Species of other coastal habitats | 7.1        | 7.9              | 37.5           | 5.5              | 3.3              |
|                  | <i>Lotus cytisoides</i>                       | Species of other coastal habitats | 6.0        | 6.6              | 44.2           | 4.1              | 5.8              |
|                  | <i>Festuca fasciculata</i>                    | Diagnostic                        | 5.8        | 6.7              | 45.3           | 3.6              | 0.0              |
